# Supplementary material for: The Relationship between Environmental Dioxygen and Iron-Sulfur Proteins Explored at the Genome Level
Source: PLoS One. 2017 Jan 30;12(1):e0171279. doi: 10.1371/journal.pone.0171279 (PMC5279795; doi:10.1371/journal.pone.0171279)
Supplement: S2 Table — (XLSX) [file pone.0171279.s006.xlsx]

## Sheet: Obligate aerobes
Organisms	Taxonomy	# Fe-S proteins	Genome size	Percentage	# distinct Fe-S Families
Aequorivita_sublithincola_DSM_14238_uid168181	Bacteroidetes/Chlorobi group Bacteroidetes	43	3140	0.0136943	36
Caulobacter_crescentus_CB15_uid57891	Proteobacteria Alphaproteobacteria	60	3737	0.0160557	52
Conexibacter_woesei_DSM_14684_uid43467	Actinobacteria Actinobacteria	80	5914	0.0135272	63
Coraliomargarita_akajimensis_DSM_45221_uid47079	Chlamydiae/Verrucomicrobia group Verrucomicrobia	63	3120	0.0201923	55
Isosphaera_pallida_ATCC_43644_uid62207	Planctomycetes Planctomycetia	71	3722	0.0190758	61
Kribbella_flavida_DSM_17836_uid43465	Actinobacteria Actinobacteria	65	6943	0.00936195	54
Kytococcus_sedentarius_DSM_20547_uid59071	Actinobacteria Actinobacteria	37	2554	0.0144871	32
Marinobacter_adhaerens_HP15_uid162009	Proteobacteria Gammaproteobacteria	94	4410	0.0213152	76
Marivirga_tractuosa_DSM_4126_uid60837	Bacteroidetes/Chlorobi group Bacteroidetes	53	3757	0.014107	46
Myxococcus_xanthus_DK_1622_uid58003	Proteobacteria delta/epsilon subdivisions	94	7316	0.0128486	65
Saprospira_grandis_Lewin_uid89375	Bacteroidetes/Chlorobi group Bacteroidetes	41	4251	0.00964479	31
Sphaerobacter_thermophilus_DSM_20745_uid41997	Chloroflexi Thermomicrobia	66	3485	0.0189383	48
Sulfolobus_acidocaldarius_DSM_639_uid58379	Crenarchaeota Thermoprotei	71	2224	0.0319245	51
Thermaerobacter_marianensis_DSM_12885_uid61727	Firmicutes Clostridia	51	2327	0.0219166	42
Thermobaculum_terrenum_ATCC_BAA_798_uid42011	Chloroflexi Thermomicrobia	61	2832	0.0215395	53
Truepera_radiovictrix_DSM_17093_uid49533	Deinococcus-Thermus Deinococci	53	2945	0.0179966	53
Tsukamurella_paurometabola_DSM_20162_uid48829	Actinobacteria Actinobacteria	52	4242	0.0122584	51
Zunongwangia_profunda_SM_A87_uid48073	Bacteroidetes/Chlorobi group Bacteroidetes	51	4653	0.0109607	41

## Sheet: Aerobes
Organisms	Taxonomy	# Fe-S proteins	Genome size	Percentage	# distinct Fe-S Families
Borrelia_burgdorferi_B31_uid57581	Spirochaetes Spirochaetia	0	1390	0	0
Mycoplasma_genitalium_G37_uid57707	Tenericutes Mollicutes	0	475	0	0
Mycoplasma_pneumoniae_M129_uid57709	Tenericutes Mollicutes	0	648	0	0
Pediococcus_claussenii_ATCC_BAA_344_uid81103	Firmicutes Bacilli	7	1881	0.00372142	5
Erysipelothrix_rhusiopathiae_SY1027_uid206518	Firmicutes Erysipelotrichia	14	1775	0.00788732	12
Clavibacter_michiganensis_sepedonicus_uid61577	Actinobacteria Actinobacteria	25	3116	0.00802311	26
Streptococcus_pyogenes_M1_GAS_uid57845	Firmicutes Bacilli	15	1696	0.00884434	13
Arthrobacter_chlorophenolicus_A6_uid58969	Actinobacteria Actinobacteria	42	4590	0.00915033	37
Enterococcus_faecalis_V583_uid57669	Firmicutes Bacilli	30	3264	0.00919118	34
Beutenbergia_cavernae_DSM_12333_uid59047	Actinobacteria Actinobacteria	39	4197	0.00929235	38
Corallococcus_coralloides_DSM_2259_uid157997	Proteobacteria delta/epsilon subdivisions	75	8033	0.00933649	56
Kineococcus_radiotolerans_SRS30216_uid58067	Actinobacteria Actinobacteria	44	4681	0.0093997	40
Rhodopirellula_baltica_SH_1_uid61589	Planctomycetes Planctomycetia	71	7325	0.00969283	54
Oceanobacillus_iheyensis_HTE831_uid57867	Firmicutes Bacilli	34	3500	0.00971429	31
Microlunatus_phosphovorus_NM_1_uid68055	Actinobacteria Actinobacteria	52	5338	0.00974148	51
Flexibacter_litoralis_DSM_6794_uid168257	Bacteroidetes/Chlorobi group Bacteroidetes	38	3878	0.00979887	35
Bacillus_thuringiensis_serovar_kurstaki_HD73_uid189188	n/a	61	6194	0.00984824	50
Nocardiopsis_alba_ATCC_BAA_2165_uid174334	Actinobacteria Actinobacteria	57	5508	0.0103486	50
Streptomyces_bingchenggensis_BCW_1_uid82931	Actinobacteria Actinobacteria	105	10022	0.010477	63
Leifsonia_xyli_cynodontis_DSM_46306_uid221294	Actinobacteria Actinobacteria	26	2470	0.0105263	26
Streptosporangium_roseum_DSM_43021_uid42521	Actinobacteria Actinobacteria	96	8975	0.0106964	61
Nocardia_brasiliensis_ATCC_700358_uid86913	Actinobacteria Actinobacteria	90	8414	0.0106965	60
Actinosynnema_mirum_DSM_43827_uid58951	Actinobacteria Actinobacteria	74	6916	0.0106998	56
Chitinophaga_pinensis_DSM_2588_uid59113	Bacteroidetes/Chlorobi group Bacteroidetes	77	7192	0.0107063	58
Brachybacterium_faecium_DSM_4810_uid58649	Actinobacteria Actinobacteria	33	3068	0.0107562	31
Xanthomonas_oryzae_PXO99A_uid59131	Proteobacteria Gammaproteobacteria	54	4988	0.010826	52
Lysinibacillus_sphaericus_C3_41_uid58945	Firmicutes Bacilli	52	4771	0.0108992	44
Psychroflexus_torquis_ATCC_700755_uid54205	Bacteroidetes/Chlorobi group Bacteroidetes	39	3526	0.0110607	34
Fluviicola_taffensis_DSM_16823_uid65271	Bacteroidetes/Chlorobi group Bacteroidetes	45	4033	0.0111579	37
Orientia_tsutsugamushi_Ikeda_uid58869	Proteobacteria Alphaproteobacteria	22	1967	0.0111845	19
Kitasatospora_setae_KM_6054_uid77027	Actinobacteria Actinobacteria	85	7566	0.0112345	60
Brevibacillus_brevis_NBRC_100599_uid59175	Firmicutes Bacilli	67	5947	0.0112662	56
Catenulispora_acidiphila_DSM_44928_uid59077	Actinobacteria Actinobacteria	101	8913	0.0113318	65
Owenweeksia_hongkongensis_DSM_17368_uid82951	Bacteroidetes/Chlorobi group Bacteroidetes	40	3485	0.0114778	37
Sorangium_cellulosum_So0157_2_uid210741	Proteobacteria delta/epsilon subdivisions	122	10400	0.0117308	83
Stackebrandtia_nassauensis_DSM_44728_uid46663	Actinobacteria Actinobacteria	75	6379	0.0117573	54
Rhizobium_leguminosarum_bv__viciae_3841_uid57955	Proteobacteria Alphaproteobacteria	84	7143	0.0117598	64
Spirosoma_linguale_DSM_74_uid43413	Bacteroidetes/Chlorobi group Bacteroidetes	82	6938	0.011819	57
Micromonospora_aurantiaca_ATCC_27029_uid42501	Actinobacteria Actinobacteria	74	6222	0.0118933	57
Herpetosiphon_aurantiacus_DSM_785_uid58599	Chloroflexi Chloroflexia	63	5279	0.0119341	49
Stigmatella_aurantiaca_DW4_3_1_uid158509	Proteobacteria delta/epsilon subdivisions	100	8352	0.0119732	69
Salinibacter_ruber_M8_uid47323	Bacteroidetes/Chlorobi group Bacteroidetes	39	3257	0.0119742	42
Amycolatopsis_mediterranei_S699_uid158689	Actinobacteria Actinobacteria	116	9575	0.0121149	66
Rothia_dentocariosa_ATCC_17931_uid49331	Actinobacteria Actinobacteria	27	2217	0.0121786	26
Bacillus_anthracis_Ames_uid57909	Firmicutes Bacilli	62	5039	0.012304	50
Flavobacterium_johnsoniae_UW101_uid58493	Bacteroidetes/Chlorobi group Bacteroidetes	62	5017	0.012358	53
Dyadobacter_fermentans_DSM_18053_uid59049	Bacteroidetes/Chlorobi group Bacteroidetes	71	5719	0.0124148	55
Planctomyces_brasiliensis_DSM_5305_uid60583	Planctomycetes Planctomycetia	59	4750	0.0124211	51
Cellulophaga_algicola_DSM_14237_uid62159	Bacteroidetes/Chlorobi group Bacteroidetes	53	4163	0.0127312	45
Zobellia_galactanivorans_uid70621	Bacteroidetes/Chlorobi group Bacteroidetes	61	4732	0.012891	48
Glaciecola_psychrophila_170_uid193711	Proteobacteria Gammaproteobacteria	74	5618	0.0131719	64
Stenotrophomonas_maltophilia_K279a_uid61647	Proteobacteria Gammaproteobacteria	58	4386	0.0132239	55
Haliscomenobacter_hydrossis_DSM_1100_uid66777	Bacteroidetes/Chlorobi group Bacteroidetes	90	6752	0.0133294	71
Ochrobactrum_anthropi_ATCC_49188_uid58921	Proteobacteria Alphaproteobacteria	64	4799	0.0133361	58
Bdellovibrio_bacteriovorus_HD100_uid61595	Proteobacteria delta/epsilon subdivisions	48	3586	0.0133854	42
Microcystis_aeruginosa_NIES_843_uid59101	Cyanobacteria Oscillatoriophycideae	85	6312	0.0134664	66
Arthrospira_platensis_NIES_39_uid197171	Cyanobacteria Oscillatoriophycideae	90	6630	0.0135747	75
Bacillus_subtilis_168_uid57675	Firmicutes Bacilli	57	4175	0.0136527	44
Niastella_koreensis_GR20_10_uid83125	Bacteroidetes/Chlorobi group Bacteroidetes	98	7174	0.0136604	69
Nakamurella_multipartita_DSM_44233_uid59221	Actinobacteria Actinobacteria	72	5240	0.0137405	53
Saccharopolyspora_erythraea_NRRL_2338_uid62947	Actinobacteria Actinobacteria	99	7197	0.0137557	66
Runella_slithyformis_DSM_19594_uid68317	Bacteroidetes/Chlorobi group Bacteroidetes	82	5774	0.0142016	59
Xylanimonas_cellulosilytica_DSM_15894_uid41935	Actinobacteria Actinobacteria	49	3443	0.0142318	45
Mesorhizobium_loti_MAFF303099_uid57601	Proteobacteria Alphaproteobacteria	104	7272	0.0143014	109
Segniliparus_rotundus_DSM_44985_uid49049	Actinobacteria Actinobacteria	43	3006	0.0143047	39
Alicyclobacillus_acidocaldarius_Tc_4_1_uid158681	Firmicutes Bacilli	46	3208	0.0143392	43
Croceibacter_atlanticus_HTCC2559_uid49661	Bacteroidetes/Chlorobi group Bacteroidetes	39	2701	0.0144391	35
Natrialba_magadii_ATCC_43099_uid46245	Euryarchaeota Halobacteria	61	4212	0.0144824	48
Gramella_forsetii_KT0803_uid58881	Bacteroidetes/Chlorobi group Bacteroidetes	52	3584	0.0145089	45
Bacillus_halodurans_C_125_uid57791	Firmicutes Bacilli	59	4052	0.0145607	49
Tropheryma_whipplei_Twist_uid57705	Actinobacteria Actinobacteria	12	808	0.0148515	11
Leadbetterella_byssophila_DSM_17132_uid60161	Bacteroidetes/Chlorobi group Bacteroidetes	52	3465	0.0150072	46
Thermobacillus_composti_KWC4_uid74021	Firmicutes Bacilli	58	3858	0.0150337	51
Pedobacter_heparinus_DSM_2366_uid59111	Bacteroidetes/Chlorobi group Bacteroidetes	64	4252	0.0150517	52
Riemerella_anatipestifer_RA_CH_1_uid175469	Bacteroidetes/Chlorobi group Bacteroidetes	33	2186	0.0150961	29
Halovivax_ruber_XH_70_uid184819	Euryarchaeota Halobacteria	47	3099	0.0151662	41
Bradyrhizobium_japonicum_USDA_6_uid158851	Proteobacteria Alphaproteobacteri	134	8826	0.0151824	74
Micrococcus_luteus_NCTC_2665_uid59033	Actinobacteria Actinobacteria	34	2236	0.0152057	32
Thermobifida_fusca_YX_uid57703	Actinobacteria Actinobacteria	47	3087	0.0152251	44
Cytophaga_hutchinsonii_ATCC_33406_uid57651	Bacteroidetes/Chlorobi group Bacteroidetes	58	3785	0.0153236	51
Saccharophagus_degradans_2_40_uid57921	Proteobacteria Gammaproteobacteria	62	4007	0.0154729	62
Mycobacterium_leprae_TN_uid57697	Actinobacteria Actinobacteria	25	1605	0.0155763	29
Cellvibrio_japonicus_Ueda107_uid59139	Proteobacteria Gammaproteobacteria	59	3750	0.0157333	55
Deinococcus_radiodurans_R1_uid57665	Deinococcus-Thermus Deinococci	50	3167	0.0157878	44
Methylobacterium_nodulans_ORS_2060_uid59023	Proteobacteria Alphaproteobacteria	132	8308	0.0158883	70
Blastococcus_saxobsidens_DD2_uid89391	Actinobacteria Actinobacteria	77	4817	0.0159851	53
Achromobacter_xylosoxidans_A8_uid59899	Proteobacteria Betaproteobacteria	109	6815	0.0159941	69
Gemmatimonas_aurantiaca_T_27_uid58813	Gemmatimonadetes Gemmatimonadetes	63	3935	0.0160102	52
Mycobacterium_tuberculosis_H37Rv_uid57777	Actinobacteria Actinobacteria	63	3906	0.016129	56
Turneriella_parva_DSM_21527_uid168321	Spirochaetes Spirochaetia	67	4139	0.0161875	59
Robiginitalea_biformata_HTCC2501_uid58285	Bacteroidetes/Chlorobi group Bacteroidetes	52	3205	0.0162246	47
Brevundimonas_subvibrioides_ATCC_15264_uid42117	Proteobacteria Alphaproteobacteria	54	3327	0.0162308	48
Xylella_fastidiosa_9a5c_uid57849	Proteobacteria Gammaproteobacteria	46	2832	0.0162429	48
Salinispora_arenicola_CNS_205_uid58659	Actinobacteria Actinobacteria	80	4917	0.0162701	57
Comamonadaceae_bacterium_CR_uid223378	Proteobacteria Betaproteobacteria	43	2626	0.0163747	43
Delftia_acidovorans_SPH_1_uid58703	Proteobacteria Betaproteobacteria	100	6040	0.0165563	71
Ornithobacterium_rhinotracheale_DSM_15997_uid168256	Bacteroidetes/Chlorobi group Bacteroidetes	38	2267	0.0167622	32
Meiothermus_silvanus_DSM_9946_uid49485	Deinococcus-Thermus Deinococci	59	3505	0.0168331	47
Emticicia_oligotrophica_DSM_17448_uid177079	Bacteroidetes/Chlorobi group Bacteroidetes	72	4267	0.0168737	55
Acidovorax_avenae_ATCC_19860_uid42497	Proteobacteria Betaproteobacteria	80	4737	0.0168883	69
Leptospira_biflexa_serovar_Patoc__Patoc_1__Paris__uid58993	Spirochaetes Spirochaetia	63	3725	0.0169128	54
Geodermatophilus_obscurus_DSM_43160_uid43725	Actinobacteria Actinobacteria	82	4810	0.0170478	58
Nitrobacter_hamburgensis_X14_uid58293	Proteobacteria Alphaproteobacteria	74	4326	0.0171059	61
Gluconobacter_oxydans_H24_uid179202	Proteobacteria Alphaproteobacteria	64	3732	0.017149	59
Pirellula_staleyi_DSM_6068_uid43209	Planctomycetes Planctomycetia	81	4717	0.0171719	66
Pseudoalteromonas_atlantica_T6c_uid58283	Proteobacteria Gammaproteobacteria	74	4281	0.0172857	63
Hyphomonas_neptunium_ATCC_15444_uid58433	Proteobacteria Alphaproteobacteria	61	3505	0.0174037	53
Terriglobus_roseus_DSM_18391_uid168183	Fibrobacteres/Acidobacteria group Acidobacteria	74	4245	0.0174323	53
Saccharomonospora_viridis_DSM_43017_uid59055	Actinobacteria Actinobacteria	67	3828	0.0175026	53
Parvularcula_bermudensis_HTCC2503_uid51641	Proteobacteria Alphaproteobacteria	47	2685	0.0175047	47
Asticcacaulis_excentricus_CB_48_uid55641	Proteobacteria Alphaproteobacteria	66	3763	0.0175392	56
Parvibaculum_lavamentivorans_DS_1_uid58739	Proteobacteria Alphaproteobacteria	64	3636	0.0176018	51
Phenylobacterium_zucineum_HLK1_uid58959	Proteobacteria Alphaproteobacteria	68	3854	0.017644	61
Sinorhizobium_meliloti_1021_uid57603	Proteobacteria Alphaproteobacteria	111	6218	0.0178514	72
Haloarcula_marismortui_ATCC_43049_uid57719	Euryarchaeota Halobacteria	76	4243	0.0179119	59
Erythrobacter_litoralis_HTCC2594_uid58299	Proteobacteria Alphaproteobacteria	54	3011	0.0179342	47
Enterobacter_cloacae_ATCC_13047_uid48363	Proteobacteria Gammaproteobacteria	99	5518	0.0179413	74
Listonella_anguillarum_M3_uid217771	Proteobacteria Gammaproteobacteria	66	3678	0.0179445	58
Halorubrum_lacusprofundi_ATCC_49239_uid58807	Euryarchaeota Halobacteria	64	3560	0.0179775	51
Weeksella_virosa_DSM_16922_uid63627	Bacteroidetes/Chlorobi group Bacteroidetes	37	2049	0.0180576	32
Phaeobacter_gallaeciensis_DSM_26640_uid232357	Proteobacteria Alphaproteobacteria	79	4359	0.0181234	64
Brucella_melitensis_bv__1_16M_uid57735	Proteobacteria Alphaproteobacteria	58	3198	0.0181363	51
Sphingopyxis_alaskensis_RB2256_uid58351	Proteobacteria Alphaproteobacteria	58	3195	0.0181534	54
Tistrella_mobilis_KA081020_065_uid167486	Proteobacteria Alphaproteobacteria	105	5783	0.0181567	68
Rickettsia_conorii_Malish_7_uid57633	Proteobacteria Alphaproteobacteria	25	1374	0.0181951	21
Kocuria_rhizophila_DC2201_uid59099	Actinobacteria Actinobacteria	43	2357	0.0182435	39
Rhodococcus_jostii_RHA1_uid58325	Actinobacteria Actinobacteria	167	9145	0.0182613	69
Granulicella_mallensis_MP5ACTX8_uid49957	Fibrobacteres/Acidobacteria group Acidobacteria	88	4815	0.0182762	64
Advenella_kashmirensis_WT001_uid80859	Proteobacteria Betaproteobacteria	72	3933	0.0183066	54
Frateuria_aurantia_DSM_6220_uid81775	Proteobacteria Gammaproteobacteria	57	3101	0.0183812	53
Halogeometricum_borinquense_DSM_11551_uid54919	Euryarchaeota Halobacteria	72	3898	0.018471	60
Thermomonospora_curvata_DSM_43183_uid41885	Actinobacteria Actinobacteria	91	4890	0.0186094	66
Cylindrospermum_stagnale_PCC_7417_uid183111	Cyanobacteria Nostocales	116	6229	0.0186226	77
Anabaena_cylindrica_PCC_7122_uid183339	Cyanobacteria Nostocales	109	5838	0.0186708	70
Nostoc_punctiforme_PCC_73102_uid57767	Cyanobacteria Nostocales	125	6689	0.0186874	76
Starkeya_novella_DSM_506_uid48815	Proteobacteria Alphaproteobacteria	83	4431	0.0187317	65
Variovorax_paradoxus_B4_uid218005	Proteobacteria Betaproteobacteria	129	6753	0.0191026	76
Paracoccus_denitrificans_PD1222_uid58187	Proteobacteria Alphaproteobacteria	97	5077	0.0191058	70
Hirschia_baltica_ATCC_49814_uid59365	Proteobacteria Alphaproteobacteria	61	3187	0.0191403	53
Ralstonia_solanacearum_GMI1000_uid57593	Proteobacteria Betaproteobacteria	98	5111	0.0191743	78
Comamonas_testosteroni_CNB_2_uid62961	Proteobacteria Betaproteobacteria	95	4894	0.0194115	64
Halopiger_xanaduensis_SH_6_uid68105	Euryarchaeota Halobacteria	83	4221	0.0196636	65
Haloferax_volcanii_DS2_uid46845	Euryarchaeota Halobacteria	79	4015	0.0196762	59
Idiomarina_loihiensis_L2TR_uid58087	Proteobacteria Gammaproteobacteria	52	2628	0.0197869	48
Acinetobacter_baumannii_ATCC_17978_uid58731	Proteobacteria Gammaproteobacteria	67	3367	0.019899	52
Chroococcidiopsis_thermalis_PCC_7203_uid183002	Cyanobacteria Pleurocapsales	116	5752	0.0201669	81
Thermobispora_bispora_DSM_43833_uid48999	Actinobacteria Actinobacteria	72	3546	0.0203046	57
Haloterrigena_turkmenica_DSM_5511_uid43501	Euryarchaeota Halobacteria	104	5113	0.0203403	67
Pseudonocardia_dioxanivorans_CB1190_uid65087	Actinobacteria Actinobacteria	139	6797	0.0204502	68
Pseudomonas_aeruginosa_PAO1_uid57945	Proteobacteria Gammaproteobacteria	115	5572	0.0206389	82
Halalkalicoccus_jeotgali_B3_uid50305	Euryarchaeota Halobacteria	80	3873	0.0206558	62
Herbaspirillum_seropedicae_SmR1_uid50427	Proteobacteria Betaproteobacteria	98	4735	0.0206969	65
Haloquadratum_walsbyi_C23_uid162019	Euryarchaeota Halobacteria	55	2652	0.0207391	48
Intrasporangium_calvum_DSM_43043_uid61729	Actinobacteria Actinobacteria	74	3563	0.020769	63
Roseobacter_litoralis_Och_149_uid54719	Proteobacteria Alphaproteobacteria	95	4537	0.0209389	69
Nitrosococcus_halophilus_Nc4_uid46803	Proteobacteria Gammaproteobacteria	80	3817	0.0209589	66
Chthonomonas_calidirosea_T49_uid208678	Armatimonadetes Chthonomonadetes	59	2809	0.0210039	53
Wolbachia_endosymbiont_of_Culex_quinquefasciatus_Pel_uid61645	Proteobacteria Alphaproteobacteria	27	1275	0.0211765	24
Frankia_symbiont_of_Datisca_glomerata_uid46257	Actinobacteria Actinobacteria	90	4215	0.0213523	62
Ramlibacter_tataouinensis_TTB310_uid68279	Proteobacteria Betaproteobacteria	83	3879	0.0213973	63
Trichodesmium_erythraeum_IMS101_uid57925	Cyanobacteria Oscillatoriophycideae	96	4451	0.0215682	64
Yersinia_pestis_CO92_uid57621	Proteobacteria Gammaproteobacteria	86	3979	0.0216135	71
Rhodothermus_marinus_DSM_4252_uid41729	Bacteroidetes/Chlorobi group Bacteroidetes	62	2863	0.0216556	58
Halothiobacillus_neapolitanus_c2_uid41317	Proteobacteria Gammaproteobacteria	52	2357	0.0220619	50
Cupriavidus_necator_N_1_uid68689	Proteobacteria Betaproteobacteria	173	7832	0.0220889	83
Natronococcus_occultus_SP4_uid184863	Euryarchaeota Halobacteria	93	4154	0.0223881	68
Dinoroseobacter_shibae_DFL_12_uid58707	Proteobacteria Alphaproteobacteria	94	4192	0.0224237	67
Chromohalobacter_salexigens_DSM_3043_uid62921	Proteobacteria Gammaproteobacteria	74	3298	0.0224378	61
Burkholderia_xenovorans_LB400_uid57823	Proteobacteria Betaproteobacteria	198	8702	0.0227534	76
Methylomonas_methanica_MC09_uid67363	Proteobacteria Gammaproteobacteria	103	4494	0.0229194	78
Gluconacetobacter_diazotrophicus_PAl_5_uid61587	Proteobacteria Alphaproteobacteria	89	3849	0.0231229	67
Rubrobacter_xylanophilus_DSM_9941_uid58057	Actinobacteria Actinobacteria	73	3140	0.0232484	56
Natronobacterium_gregoryi_SP2_uid74439	Euryarchaeota Halobacteria	85	3656	0.0232495	65
Nitrosospira_multiformis_ATCC_25196_uid58361	Proteobacteria Betaproteobacteria	66	2805	0.0235294	54
Ruegeria_pomeroyi_DSS_3_uid57863	Proteobacteria Alphaproteobacteria	101	4278	0.0236092	74
Anaplasma_phagocytophilum_HZ_uid57951	Proteobacteria Alphaproteobacteria	30	1264	0.0237342	29
Cenarchaeum_symbiosum_A_uid61411	Thaumarchaeota Cenarchaeales	48	2014	0.0238332	35
Methylovorus_glucosetrophus_SIP3_4_uid59367	Proteobacteria Betaproteobacteria	70	2909	0.0240633	65
Acetobacter_pasteurianus_IFO_3283_01_uid59279	Proteobacteria Alphaproteobacteria	74	3049	0.0242703	63
Herminiimonas_arsenicoxydans_uid58291	Proteobacteria Betaproteobacteria	80	3294	0.0242866	64
Cyanobium_gracile_PCC_6307_uid182931	Cyanobacteria Oscillatoriophycideae	80	3280	0.0243902	65
Natronomonas_pharaonis_DSM_2160_uid58435	Euryarchaeota Halobacteria	69	2820	0.0244681	58
Thermomicrobium_roseum_DSM_5159_uid59341	Chloroflexi Thermomicrobia	70	2854	0.024527	56
Alcanivorax_borkumensis_SK2_uid58169	Proteobacteria Gammaproteobacteria	69	2755	0.0250454	60
Thermus_thermophilus_HB8_uid58223	Deinococcus-Thermus Deinococci	55	2173	0.0253106	48
Azotobacter_vinelandii_DJ_uid57597	Proteobacteria Gammaproteobacteria	128	5050	0.0253465	83
Helicobacter_pylori_26695_uid178201	Proteobacteria delta/epsilon subdivisions	41	1594	0.0257215	37
Methylobacillus_flagellatus_KT_uid58049	Proteobacteria Betaproteobacteria	71	2753	0.02579	62
Beijerinckia_indica_ATCC_9039_uid59057	Proteobacteria Alphaproteobacteria	99	3784	0.0261628	66
Thioalkalimicrobium_cyclicum_ALM1_uid67391	Proteobacteria Gammaproteobacteria	44	1665	0.0264264	43
Acidiphilium_multivorum_AIU301_uid63345	Proteobacteria Alphaproteobacteria	105	3948	0.0265957	70
Gallionella_capsiferriformans_ES_2_uid51505	Proteobacteria Betaproteobacteria	77	2894	0.0266068	70
Salmonella_enterica_serovar_Typhimurium_LT2_uid57799	Proteobacteria Gammaproteobacteria	122	4553	0.0267955	80
Aeropyrum_pernix_K1_uid57757	Crenarchaeota Thermoprotei	46	1700	0.0270588	41
Bartonella_quintana_Toulouse_uid57635	Proteobacteria Alphaproteobacteria	31	1142	0.0271454	28
Granulibacter_bethesdensis_CGDNIH1_uid58661	Proteobacteria Alphaproteobacteria	67	2433	0.027538	55
Acidothermus_cellulolyticus_11B_uid58501	Actinobacteria Actinobacteria	60	2157	0.0278164	56
Acidimicrobium_ferrooxidans_DSM_10331_uid59215	Actinobacteria Actinobacteria	56	1964	0.0285132	53
Moraxella_catarrhalis_BBH18_uid48809	Proteobacteria Gammaproteobacteria	54	1886	0.028632	50
Morganella_morganii_KT_uid180867	Proteobacteria Gammaproteobacteria	101	3526	0.0286444	80
Sphingomonas_wittichii_RW1_uid58691	Proteobacteria Alphaproteobacteria	155	5345	0.0289991	64
Neisseria_meningitidis_MC58_uid57817	Proteobacteria Betaproteobacteria	57	1953	0.0291859	50
Picrophilus_torridus_DSM_9790_uid58041	Euryarchaeota Thermoplasmata	45	1537	0.0292778	36
Kyrpidia_tusciae_DSM_2912_uid48361	Firmicutes Bacilli	93	3150	0.0295238	69
Rickettsia_prowazekii_Madrid_E_uid61565	Proteobacteria Alphaproteobacteria	25	843	0.029656	21
Leptothrix_cholodnii_SP_6_uid58971	Proteobacteria Betaproteobacteria	131	4363	0.0300252	76
Neorickettsia_sennetsu_Miyayama_uid57965	Proteobacteria Alphaproteobacteria	28	932	0.0300429	27
Methylacidiphilum_infernorum_V4_uid59161	Chlamydiae/Verrucomicrobia group Verrucomicrobia	79	2472	0.0319579	63
Polynucleobacter_necessarius_asymbioticus_QLW_P1DMWA_1_uid58611	Proteobacteria Betaproteobacteria	68	2077	0.0327395	61
Methylocella_silvestris_BL2_uid59433	Proteobacteria Alphaproteobacteria	127	3818	0.0332635	83
Sulfurimonas_autotrophica_DSM_16294_uid53043	Proteobacteria delta/epsilon subdivisions	74	2158	0.034291	55
Caldivirga_maquilingensis_IC_167_uid58711	Crenarchaeota Thermoprotei	69	1963	0.0351503	46
Pyrolobus_fumarii_1A_uid73415	Crenarchaeota Thermoprotei	76	1967	0.0386375	56
Metallosphaera_sedula_DSM_5348_uid58717	Crenarchaeota Thermoprotei	90	2256	0.0398936	58

## Sheet: Facultative anaerobes
Organisms	Taxonomy	# Fe-S proteins	Genome size	Percentage	# distinct Fe-S Families
Actinobacillus_suis_H91_0380_uid176363	Proteobacteria Gammaproteobacteria	57	2248	0.0253559	48
Aeromonas_salmonicida_A449_uid58631	Proteobacteria Gammaproteobacteria	90	4436	0.0202885	79
Aggregatibacter_actinomycetemcomitans_D7S_1_uid46989	Proteobacteria Gammaproteobacteria	55	2255	0.0243902	50
Alicycliphilus_denitrificans_K601_uid66307	Proteobacteria Betaproteobacteria	87	4696	0.0185264	71
Aliivibrio_salmonicida_LFI1238_uid59251	Proteobacteria Gammaproteobacteria	67	3911	0.0171312	60
Aromatoleum_aromaticum_EbN1_uid58231	Proteobacteria Betaproteobacteria	133	4576	0.0290647	90
Azospirillum_brasilense_Sp245_uid162161	Proteobacteria Alphaproteobacteria	136	7527	0.0180683	78
Chromobacterium_violaceum_ATCC_12472_uid58001	Proteobacteria Betaproteobacteria	83	4405	0.0188422	68
Citrobacter_koseri_ATCC_BAA_895_uid58143	Proteobacteria Gammaproteobacteria	111	5006	0.0221734	79
Colwellia_psychrerythraea_34H_uid57855	Proteobacteria Gammaproteobacteria	91	4909	0.0185374	72
Coxiella_burnetii_Dugway_5J108_111_uid58629	Proteobacteria Gammaproteobacteria	37	2045	0.0180929	38
Cronobacter_turicensis_z3032_uid40821	Proteobacteria Gammaproteobacteria	84	4452	0.0188679	73
Dechloromonas_aromatica_RCB_uid58025	Proteobacteria Betaproteobacteria	146	4171	0.0350036	86
Dickeya_dadantii_3937_uid52537	Proteobacteria Gammaproteobacteria	101	4549	0.0222027	80
Edwardsiella_ictaluri_93_146_uid59403	Proteobacteria Gammaproteobacteria	89	3735	0.0238286	70
Erwinia_amylovora_ATCC_49946_uid46943	Proteobacteria Gammaproteobacteria	48	3565	0.0134642	47
Escherichia_coli_K_12_substr__MG1655_uid57779	Proteobacteria Gammaproteobacteria	124	4140	0.0299517	83
Ferrimonas_balearica_DSM_9799_uid53371	Proteobacteria Gammaproteobacteria	119	3782	0.0314648	74
Haemophilus_influenzae_Rd_KW20_uid57771	Proteobacteria Gammaproteobacteria	47	1610	0.0291925	42
Halomonas_elongata_DSM_2581_uid52781	Proteobacteria Gammaproteobacteria	66	3473	0.0190037	58
Kangiella_koreensis_DSM_16069_uid59209	Proteobacteria Gammaproteobacteria	62	2632	0.0235562	58
Klebsiella_pneumoniae_342_uid59145	Proteobacteria Gammaproteobacteria	119	5766	0.0206382	82
Magnetococcus_MC_1_uid57833	Proteobacteria Alphaproteobacteria	116	3716	0.0312164	79
Maricaulis_maris_MCS10_uid58689	Proteobacteria Alphaproteobacteria	60	3063	0.0195886	53
Methylibium_petroleiphilum_PM1_uid58085	Proteobacteria Betaproteobacteria	115	4449	0.0258485	76
Pantoea_At_9b_uid55845	Proteobacteria Gammaproteobacteria	90	5770	0.0155979	76
Pasteurella_multocida_Pm70_uid57627	Proteobacteria Gammaproteobacteria	58	2012	0.028827	46
Photobacterium_profundum_SS9_uid62923	Proteobacteria Gammaproteobacteria	110	5489	0.0200401	85
Photorhabdus_luminescens_laumondii_TTO1_uid61593	Proteobacteria Gammaproteobacteria	74	4683	0.0158018	93
Proteus_mirabilis_HI4320_uid61599	Proteobacteria Gammaproteobacteria	96	3662	0.0262152	71
Pseudovibrio_FO_BEG1_uid82373	Proteobacteria Alphaproteobacteria	97	5467	0.0177428	70
Rhodobacter_sphaeroides_KD131_uid59277	Proteobacteria Alphaproteobacteria	112	4568	0.0245184	75
Rhodopseudomonas_palustris_CGA009_uid62901	Proteobacteria Alphaproteobacteria	146	4820	0.0302905	78
Rubrivivax_gelatinosus_IL144_uid158163	Proteobacteria Betaproteobacteria	133	4693	0.0283401	83
Serratia_plymuthica_S13_uid210642	Proteobacteria Gammaproteobacteria	93	4991	0.0186335	81
Shewanella_oneidensis_MR_1_uid57949	Proteobacteria Gammaproteobacteria	101	4214	0.0239677	107
Shigella_dysenteriae_1617_uid229875	Proteobacteria Gammaproteobacteria	100	6409	0.0156031	72
Simiduia_agarivorans_SA1_uid177713	Proteobacteria Gammaproteobacteria	71	3820	0.0185864	71
Thiobacillus_denitrificans_ATCC_25259_uid58189	Proteobacteria Betaproteobacteria	99	2827	0.0350195	121
Tolumonas_auensis_DSM_9187_uid59395	Proteobacteria Gammaproteobacteria	84	3130	0.0268371	71
Vibrio_cholerae_O1_biovar_El_Tor_N16961_uid57623	Proteobacteria Gammaproteobacteria	71	3504	0.0202626	64
Xanthobacter_autotrophicus_Py2_uid58453	Proteobacteria Alphaproteobacteria	127	5035	0.0252234	75
Xenorhabdus_nematophila_ATCC_19061_uid49133	Proteobacteria Gammaproteobacteria	66	4469	0.0147684	57

## Sheet: Anaerobes
Organisms	Taxonomy	# Fe-S proteins	Genome size	Percentage	# distinct Fe-S Families	Organism classification
Ketogulonicigenium_vulgare_Y25_uid59581	Proteobacteria Alphaproteobacteria	41	3213	0.0127607	36	LC
Leptotrichia_buccalis_C_1013_b_uid59211	Fusobacteria Fusobacteriia	32	2220	0.0144144	25	LC
Roseburia_intestinalis_XB6B4_uid197179	Firmicutes Clostridia	59	3610	0.0163435	59	LC
Tannerella_forsythia_ATCC_43037_uid83157	Bacteroidetes/Chlorobi group Bacteroidetes	53	3001	0.0176608	44	LC
Propionibacterium_acidipropionici_ATCC_4875_uid179069	Actinobacteria Actinobacteria	59	3336	0.0176859	60	LC
Halorhabdus_tiamatea_SARL4B_uid214082	Euryarchaeota Halobacteria	55	3023	0.0181938	53	LC
Treponema_pallidum_Nichols_uid57585	Spirochaetes Spirochaetia	19	1036	0.0183398	20	LC
Sebaldella_termitidis_ATCC_33386_uid41865	Fusobacteria Fusobacteriia	81	4150	0.0195181	65	LC
Dichelobacter_nodosus_VCS1703A_uid57643	Proteobacteria Gammaproteobacteria	25	1280	0.0195312	22	LC
Porphyromonas_gingivalis_TDC60_uid67407	Bacteroidetes/Chlorobi group Bacteroidetes	44	2217	0.0198466	42	LC
Bordetella_petrii_uid61631	Proteobacteria Betaproteobacteria	100	5027	0.0198926	65	LC
Mobiluncus_curtisii_ATCC_43063_uid49695	Actinobacteria Actinobacteria	39	1909	0.0204295	41	LC
Parabacteroides_distasonis_ATCC_8503_uid58301	Bacteroidetes/Chlorobi group Bacteroidetes	79	3849	0.0205248	71	LC
Butyrivibrio_proteoclasticus_B316_uid51489	Firmicutes Clostridia	79	3811	0.0207295	58	LC
Arcanobacterium_haemolyticum_DSM_20595_uid49489	Actinobacteria Actinobacteria	36	1731	0.0207972	31	LC
Akkermansia_muciniphila_ATCC_BAA_835_uid58985	Chlamydiae/Verrucomicrobia group Verrucomicrobia	46	2138	0.0215154	46	LC
Paludibacter_propionicigenes_WB4_uid60725	Bacteroidetes/Chlorobi group Bacteroidetes	65	3020	0.0215232	53	LC
Fusobacterium_nucleatum_ATCC_25586_uid57885	Fusobacteria Fusobacteriia	43	1983	0.0216843	50	LC
Odoribacter_splanchnicus_DSM_20712_uid63397	Bacteroidetes/Chlorobi group Bacteroidetes	76	3497	0.0217329	71	LC
Psychromonas_ingrahamii_37_uid58521	Proteobacteria Gammaproteobacteria	79	3545	0.0222849	67	LC
Thiomicrospira_crunogena_XCL_2_uid58183	Proteobacteria Gammaproteobacteria	49	2196	0.0223133	49	LC
Prevotella_ruminicola_23_uid47507	Bacteroidetes/Chlorobi group Bacteroidetes	64	2763	0.0231632	55	LC
Ruminococcus_albus_7_uid51721	Firmicutes Clostridia	90	3872	0.0232438	65	LC
Fibrobacter_succinogenes_S85_uid41169	Fibrobacteres/Acidobacteria group Fibrobacteres	73	3085	0.0236629	54	LC
Brachyspira_intermedia_PWS_A_uid158369	Spirochaetes Spirochaetia	72	2872	0.0250696	64	LC
Filifactor_alocis_ATCC_35896_uid46625	Firmicutes Clostridia	42	1641	0.0255941	40	LC
Synergistetes_bacterium_SGP1_uid197182	Synergistia	37	1431	0.025856	42	LC
Clostridium_acetobutylicum_ATCC_824_uid57677	Firmicutes Clostridia	101	3778	0.0267337	79	LC
Rhodoferax_ferrireducens_T118_uid58353	Proteobacteria Betaproteobacteria	120	4417	0.0271678	89	LC
Anaeromyxobacter_dehalogenans_2CP_1_uid58989	Proteobacteria delta/epsilon subdivisions	122	4473	0.0272748	82	LC
Eubacterium_limosum_KIST612_uid59777	Firmicutes Clostridia	125	4571	0.0273463	91	LC
Nanoarchaeum_equitans_Kin4_M_uid58009	Nanoarchaeota Nanoarchaeum	15	540	0.0277778	13	LC
Selenomonas_ruminantium_lactilytica_TAM6421_uid157247	Firmicutes Negativicutes	104	3512	0.0296128	81	LC
Mahella_australiensis_50_1_BON_uid66917	Firmicutes Clostridia	85	2870	0.0296167	73	LC
Symbiobacterium_thermophilum_IAM_14863_uid58165	Firmicutes Clostridia	99	3337	0.0296674	74	LC
Sphaerochaeta_pleomorpha_Grapes_uid82365	Spirochaetes Spirochaetia	95	3159	0.0300728	80	LC
Melioribacter_roseus_P3M_uid170941	Bacteroidetes/Chlorobi group Ignavibacteriae	88	2840	0.0309859	69	HC
Coprococcus_catus_GD_7_uid197174	Firmicutes Clostridia	93	2972	0.0312921	67	HC
Anaerococcus_prevotii_DSM_20548_uid59219	Firmicutes Clostridia	57	1806	0.0315615	52	HC
Thiocystis_violascens_DSM_198_uid74025	Proteobacteria Gammaproteobacteria	138	4330	0.0318707	86	HC
Finegoldia_magna_ATCC_29328_uid58867	Firmicutes Clostridia	58	1812	0.0320088	56	HC
Nitratifractor_salsuginis_DSM_16511_uid62183	Proteobacteria delta/epsilon subdivisions	67	2088	0.0320881	55	HC
Alkaliphilus_metalliredigens_QYMF_uid58171	Firmicutes Clostridia	150	4625	0.0324324	91	HC
Veillonella_parvula_DSM_2008_uid41927	Firmicutes Negativicutes	61	1844	0.0330803	57	HC
Acidaminococcus_intestini_RyC_MR95_uid74445	Firmicutes Negativicutes	80	2401	0.0333195	62	HC
Elusimicrobium_minutum_Pei191_uid58949	Elusimicrobia Elusimicrobia	51	1529	0.0333551	52	HC
Alkalilimnicola_ehrlichii_MLHE_1_uid58467	Proteobacteria Gammaproteobacteria	99	2865	0.034555	76	HC
Staphylothermus_hellenicus_DSM_12710_uid45893	Crenarchaeota Thermoprotei	56	1599	0.0350219	44	HC
Vulcanisaeta_distributa_DSM_14429_uid52827	Crenarchaeota Thermoprotei	90	2493	0.0361011	61	HC
Sulfuricurvum_kujiense_DSM_16994_uid60789	Proteobacteria delta/epsilon subdivisions	102	2798	0.0364546	68	HC
Coprothermobacter_proteolyticus_DSM_5265_uid59253	Firmicutes Clostridia	55	1482	0.037112	44	HC
Thermococcus_kodakarensis_KOD1_uid58225	Euryarchaeota Thermococci	86	2306	0.037294	56	HC
Thermosipho_africanus_TCF52B_uid59095	Thermotogae Thermotogae	73	1954	0.0373593	54	HC
Halorhodospira_halophila_SL1_uid58473	Proteobacteria Gammaproteobacteria	91	2407	0.0378064	68	HC
Fervidobacterium_pennivorans_DSM_9078_uid78143	Thermotogae Thermotogae	74	1947	0.0380072	50	HC
Heliobacterium_modesticaldum_Ice1_uid58279	Firmicutes Clostridia	114	2999	0.0380127	80	HC
Hippea_maritima_DSM_10411_uid65267	Proteobacteria delta/epsilon subdivisions	64	1677	0.0381634	59	HC
Desulfurispirillum_indicum_S5_uid45897	Chrysiogenetes Chrysiogenetes	99	2571	0.0385064	72	HC
Allochromatium_vinosum_DSM_180_uid46083	Proteobacteria Gammaproteobacteria	124	3220	0.0385093	81	HC
Thermosediminibacter_oceani_DSM_16646_uid51421	Firmicutes Clostridia	85	2197	0.0386891	69	HC
Methanoculleus_bourgensis_MS2_uid171377	Euryarchaeota Methanomicrobia	100	2580	0.0387597	73	HC
Pelodictyon_phaeoclathratiforme_BU_1_uid58173	Bacteroidetes/Chlorobi group Chlorobi	105	2707	0.0387883	69	HC
Halothermothrix_orenii_H_168_uid58585	Firmicutes Clostridia	91	2342	0.0388557	72	HC
Methanosarcina_acetivorans_C2A_uid57879	Euryarchaeota Methanomicrobia	177	4540	0.0389868	94	HC
Marinitoga_piezophila_KA3_uid81629	Thermotogae Thermotogae	81	2046	0.0395894	60	HC
Halobacteroides_halobius_DSM_5150_uid184862	Firmicutes Clostridia	98	2468	0.0397083	73	HC
Caldisphaera_lagunensis_DSM_15908_uid183486	Crenarchaeota Thermoprotei	59	1478	0.0399188	41	HC
Acidilobus_saccharovorans_345_15_uid51395	Crenarchaeota Thermoprotei	60	1499	0.0400267	40	HC
Caldicellulosiruptor_saccharolyticus_DSM_8903_uid58289	Firmicutes Clostridia	109	2682	0.0406413	74	HC
Thermoplasmatales_archaeon_BRNA1_uid195930	Euryarchaeota Thermoplasmata	64	1523	0.0420223	53	HC
Methanospirillum_hungatei_JF_1_uid58181	Euryarchaeota Methanomicrobia	132	3131	0.0421591	87	HC
Dictyoglomus_thermophilum_H_6_12_uid59439	Dictyoglomi Dictyoglomia	81	1912	0.042364	62	HC
Petrotoga_mobilis_SJ95_uid58747	Thermotogae Thermotogae	81	1898	0.0426765	58	HC
Pelobacter_propionicus_DSM_2379_uid58255	Proteobacteria delta/epsilon subdivisions	163	3804	0.0428496	83	HC
Thermoproteus_tenax_Kra_1_uid74443	Crenarchaeota Thermoprotei	88	2049	0.0429478	60	HC
Syntrophomonas_wolfei_Goettingen_uid58179	Firmicutes Clostridia	108	2504	0.043131	70	HC
Methanosaeta_concilii_GP6_uid66207	Euryarchaeota Methanomicrobia	123	2850	0.0431579	82	HC
Thermosphaera_aggregans_DSM_11486_uid48993	Crenarchaeota Thermoprotei	60	1387	0.0432588	43	HC
Thermovibrio_ammonificans_HB_1_uid62095	Aquificae Aquificae	79	1813	0.0435742	63	HC
Caldisericum_exile_AZM16c01_uid158173	Caldiserica Caldisericia	69	1581	0.0436433	52	HC
Desulfotalea_psychrophila_LSv54_uid58153	Proteobacteria delta/epsilon subdivisions	143	3234	0.0442177	94	HC
Hyperthermus_butylicus_DSM_5456_uid57755	Crenarchaeota Thermoprotei	73	1603	0.0455396	44	HC
Desulfocapsa_sulfexigens_DSM_10523_uid189952	Proteobacteria delta/epsilon subdivisions	161	3532	0.0455832	93	HC
Calditerrivibrio_nitroreducens_DSM_19672_uid60821	Deferribacteres Deferribacteres	96	2100	0.0457143	76	HC
Syntrophobotulus_glycolicus_DSM_8271_uid63343	Firmicutes Clostridia	149	3251	0.0458321	87	HC
Methanobrevibacter_ruminantium_M1_uid45857	Euryarchaeota Methanobacteria	102	2217	0.0460081	65	HC
Ignicoccus_hospitalis_KIN4_I_uid58365	Crenarchaeota Thermoprotei	66	1434	0.0460251	53	HC
Flexistipes_sinusarabici_DSM_4947_uid68147	Deferribacteres Deferribacteres	105	2261	0.0464396	80	HC
Thermotoga_maritima_MSB8_uid202924	Thermotogae Thermotogae	88	1891	0.0465362	63	HC
Methanohalobium_evestigatum_Z_7303_uid49857	Euryarchaeota Methanomicrobia	105	2254	0.0465839	71	HC
Syntrophus_aciditrophicus_SB_uid58539	Proteobacteria delta/epsilon subdivisions	148	3166	0.0467467	90	HC
Deferribacter_desulfuricans_SSM1_uid46653	Deferribacteres Deferribacteres	111	2374	0.0467565	81	HC
Ilyobacter_polytropus_DSM_2926_uid59769	Fusobacteria Fusobacteriia	137	2880	0.0475694	84	HC
Acetobacterium_woodii_DSM_1030_uid88073	Firmicutes Clostridia	166	3473	0.0477973	102	HC
Wolinella_succinogenes_DSM_1740_uid61591	Proteobacteria delta/epsilon subdivisions	98	2043	0.0479687	64	HC
Methanococcoides_burtonii_DSM_6242_uid58023	Euryarchaeota Methanomicrobia	112	2273	0.0492741	78	HC
Methanosphaera_stadtmanae_DSM_3091_uid58407	Euryarchaeota Methanobacteria	76	1535	0.0495114	59	HC
Desulfarculus_baarsii_DSM_2075_uid51371	Proteobacteria delta/epsilon subdivisions	163	3277	0.0497406	97	HC
Desulfurivibrio_alkaliphilus_AHT2_uid49487	Proteobacteria delta/epsilon subdivisions	131	2620	0.05	83	HC
Desulfobacca_acetoxidans_DSM_11109_uid65785	Proteobacteria delta/epsilon subdivisions	145	2866	0.0505932	83	HC
Pelotomaculum_thermopropionicum_SI_uid58877	Firmicutes Clostridia	149	2919	0.0510449	89	HC
Desulfobulbus_propionicus_DSM_2032_uid62265	Proteobacteria delta/epsilon subdivisions	168	3283	0.0511727	96	HC
Thermacetogenium_phaeum_DSM_12270_uid177811	Firmicutes Clostridia	147	2824	0.0520538	82	HC
Geobacter_metallireducens_GS_15_uid57731	Proteobacteria delta/epsilon subdivisions	189	3566	0.0530006	106	HC
Acetohalobium_arabaticum_DSM_5501_uid51423	Firmicutes Clostridia	121	2282	0.0530237	83	HC
Desulfobacterium_autotrophicum_HRM2_uid59061	Proteobacteria delta/epsilon subdivisions	265	4943	0.0536112	117	HC
Methanosalsum_zhilinae_DSM_4017_uid68249	Euryarchaeota Methanomicrobia	107	1976	0.0541498	73	HC
Eggerthella_lenta_DSM_2243_uid59079	Actinobacteria Actinobacteria	167	3070	0.0543974	73	HC
Thermodesulfatator_indicus_DSM_15286_uid68285	Thermodesulfobacteria Thermodesulfobacteria	120	2195	0.0546697	82	HC
Methanosphaerula_palustris_E1_9c_uid59193	Euryarchaeota Methanomicrobia	146	2655	0.0549906	84	HC
Desulfurobacterium_thermolithotrophum_DSM_11699_uid63405	Aquificae Aquificae	85	1509	0.0563287	63	HC
Ammonifex_degensii_KC4_uid41053	Firmicutes Clostridia	118	2080	0.0567308	74	HC
Desulfomonile_tiedjei_DSM_6799_uid168320	Proteobacteria delta/epsilon subdivisions	312	5494	0.0567892	118	HC
Desulfatibacillum_alkenivorans_AK_01_uid58913	Proteobacteria delta/epsilon subdivisions	299	5252	0.0569307	118	HC
Methanocorpusculum_labreanum_Z_uid58785	Euryarchaeota Methanomicrobia	100	1741	0.0574383	72	HC
Desulfitobacterium_hafniense_Y51_uid58605	Firmicutes Clostridia	292	5060	0.0577075	107	HC
Ferroglobus_placidus_DSM_10642_uid40863	Euryarchaeota Archaeoglobi	144	2480	0.0580645	80	HC
Thermincola_potens_JR_uid48823	Firmicutes Clostridia	172	2949	0.0583249	91	HC
Methanopyrus_kandleri_AV19_uid57883	Euryarchaeota Methanopyri	99	1687	0.0586841	68	HC
Carboxydothermus_hydrogenoformans_Z_2901_uid57821	Firmicutes Clostridia	154	2620	0.0587786	85	HC
Methanohalophilus_mahii_DSM_5219_uid47313	Euryarchaeota Methanomicrobia	118	1987	0.059386	83	HC
Desulfosporosinus_orientis_DSM_765_uid82939	Firmicutes Clostridia	314	5242	0.0599008	124	HC
Desulfobacula_toluolica_Tol2_uid175777	Proteobacteria delta/epsilon subdivisions	269	4375	0.0614857	110	HC
Desulfococcus_oleovorans_Hxd3_uid58777	Proteobacteria delta/epsilon subdivisions	205	3265	0.0627871	97	HC
Syntrophobacter_fumaroxidans_MPOB_uid58177	Proteobacteria delta/epsilon subdivisions	259	4064	0.0637303	113	HC
Dehalogenimonas_lykanthroporepellens_BL_DC_9_uid48131	Chloroflexi Dehalococcoidia	107	1659	0.0644967	59	HC
Thermodesulfobium_narugense_DSM_14796_uid66601	Firmicutes Clostridia	117	1807	0.0647482	77	HC
Methanothermococcus_okinawensis_IH1_uid51535	Euryarchaeota Methanococci	105	1595	0.0658307	62	HC
Methanotorris_igneus_Kol_5_uid67321	Euryarchaeota Methanococci	117	1772	0.0660271	69	HC
Moorella_thermoacetica_ATCC_39073_uid58051	Firmicutes Clostridia	163	2463	0.0661795	96	HC

## Sheet: Obligate Anaerobes
Organisms	Taxonomy	# Fe-S proteins	Genome size	Percentage	# distinct Fe-S Families
Aminobacterium_colombiense_DSM_12261_uid47083	Synergistetes Synergistia	73	1876	0.0389126	67
Anaerobaculum_mobile_DSM_13181_uid168323	Synergistetes Synergistia	105	2017	0.0520575	78
Archaeoglobus_fulgidus_DSM_4304_uid57717	Euryarchaeota Archaeoglobi	144	2420	0.0595041	79
Chlorobium_tepidum_TLS_uid57897	Bacteroidetes/Chlorobi group Chlorobi	102	2245	0.0454343	71
Coriobacterium_glomerans_PW2_uid65787	Actinobacteria Actinobacteria	39	1768	0.0220588	41
Cryptobacterium_curtum_DSM_15641_uid59041	Actinobacteria Actinobacteria	73	1357	0.0537951	54
Denitrovibrio_acetiphilus_DSM_12809_uid46657	Deferribacteres Deferribacteres	138	2964	0.0465587	88
Desulfohalobium_retbaense_DSM_5692_uid59183	Proteobacteria delta/epsilon subdivisions	143	2526	0.0566112	93
Desulfomicrobium_baculatum_DSM_4028_uid59217	Proteobacteria delta/epsilon subdivisions	176	3436	0.0512224	94
Desulfovibrio_vulgaris_Hildenborough_uid57645	Proteobacteria delta/epsilon subdivisions	154	3535	0.0435644	96
Desulfurococcus_kamchatkensis_1221n_uid59133	Crenarchaeota Thermoprotei	61	1471	0.0414684	43
Fervidicoccus_fontis_Kam940_uid162201	Crenarchaeota Thermoprotei	57	1385	0.0411552	41
Gordonibacter_pamelaeae_7_10_1_b_uid197167	Actinobacteria Actinobacteria	123	2021	0.060861	54
Ignisphaera_aggregans_DSM_17230_uid51875	Crenarchaeota Thermoprotei	58	1930	0.0300518	45
Methanocaldococcus_jannaschii_DSM_2661_uid57713	Euryarchaeota Methanococci	102	1771	0.0575946	66
Methanococcus_maripaludis_S2_uid58035	Euryarchaeota Methanococci	114	1722	0.0662021	70
Methanomethylovorans_hollandica_DSM_15978_uid184864	Euryarchaeota Methanomicrobia	115	2556	0.0449922	79
Methanoplanus_petrolearius_DSM_11571_uid52695	Euryarchaeota Methanomicrobia	139	2785	0.0499102	83
Methanothermobacter_thermautotrophicus_Delta_H_uid57877	Euryarchaeota Methanobacteria	120	1873	0.0640683	80
Methanothermus_fervidus_DSM_2088_uid60167	Euryarchaeota Methanobacteria	83	1283	0.0646921	59
Natranaerobius_thermophilus_JW_NM_WN_LF_uid59001	Firmicutes Clostridia	137	2906	0.0471438	87
Nautilia_profundicola_AmH_uid59345	Proteobacteria delta/epsilon subdivisions	69	1730	0.0398844	51
Pyrococcus_abyssi_GE5_uid62903	Euryarchaeota Thermococci	80	1780	0.0449438	57
Pyrococcus_furiosus_DSM_3638_uid57873	Euryarchaeota Thermococci	87	2122	0.0409991	62
Slackia_heliotrinireducens_DSM_20476_uid59051	Actinobacteria Actinobacteria	162	2766	0.0585683	73
Spirochaeta_smaragdinae_DSM_11293_uid51369	Spirochaetes Spirochaetia	128	4219	0.0303389	90
Syntrophothermus_lipocalidus_DSM_12680_uid49527	Firmicutes Clostridia	124	2313	0.05361	82
Thermanaerovibrio_acidaminovorans_DSM_6589_uid41925	Synergistetes Synergistia	77	1730	0.0445087	63
Thermovirga_lienii_DSM_17291_uid77129	Synergistetes Synergistia	88	1875	0.0469333	66
